# Supplementary material for: Reporting Quality of Randomized Controlled Trials for the Treatment of Eczema with Chinese Patent Medicine Based on the CONSORT-CHM Formulas 2017
Source: Evid Based Complement Alternat Med. 2020 Sep 14;2020:2949125. doi: 10.1155/2020/2949125 (PMC7512083; doi:10.1155/2020/2949125)
Supplement: Supplementary Materials — Supplementary Table 1: checklist of items for the CONSORT-CHM formulas 2017. Supplementary Table 2: the list of Chinese patent medicine with the indication for eczema. Supplementary File 1: the list of 144 randomized controlled trials on Chinese patent medicine for eczema. Supplementary Table 3: the characteristics of 144 randomized controlled trials on Chinese patent medicine for eczema. Supplementary Table 4: the score of each item for 144 randomized controlled trials based on the CONSORT-CHM formulas 2017. [file 2949125.f1.zip]

Archive with 5 entries (5 files):
- 2949125.f1/Supplementary File 1 The list of 144 randomized controlled trials (2).docx
- 2949125.f1/Supplementary Table 1 Checklist of items for CONSORT-CHM formulas 2017 (1).docx
- 2949125.f1/Supplementary Table 2 The list of Chinese patent medicine with the indication for eczema (1).docx
- 2949125.f1/Supplementary Table 3 The characteristics of 144 randomized controlled trials on Chinese patent medicine for eczema.docx
- 2949125.f1/Supplementary Table 4 The score of each item for 144 randomized controlled trials based on the CONSORT-CHM formulas 2017 (1).docx
